# Supplementary material for: Microfluidic fluorescent platform for rapid and visual detection of veterinary drugs
Source: Royal Society of Chemistry journal article supplement (doi:10.1039/d2ra00626j), 2022-01-01
Supplement: d2ra00626j2.pdf [file d2ra00626j2.pdf]

## Supplementary Information

# Microfluidic fluorescent platform for rapid and visual detection of veterinary drugs

*Ge Li, Hao Li, Jiang Zhai, Jiazhuang Guo, Qing Li, Cai-Feng Wang\* and Su Chen\**

State Key Laboratory of Materials-Oriented Chemical Engineering, College of Chemical Engineering, Jiangsu Key Laboratory of Fine Chemicals and Functional Polymer Materials, Nanjing Tech University, Nanjing 210009, China.

**\*Corresponding Author:**

\* E-mail: [caifengwang@njtech.edu.cn](mailto:caifengwang@njtech.edu.cn); [chensu@njtech.edu.cn](mailto:chensu@njtech.edu.cn).

Number of Pages: 6

Number of Figures: 4

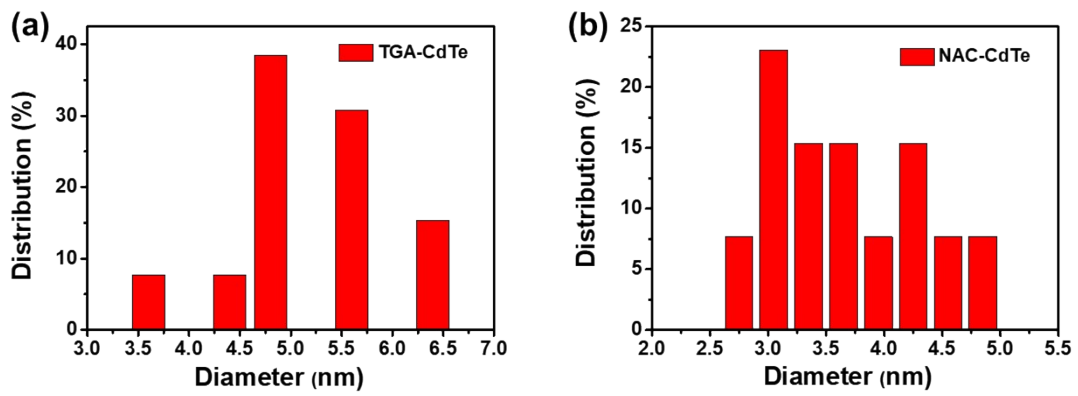

**Fig. S1.** Size distribution histogram of (a) the TGA-CdTe QDs and (b) the NAC-CdTe QDs.

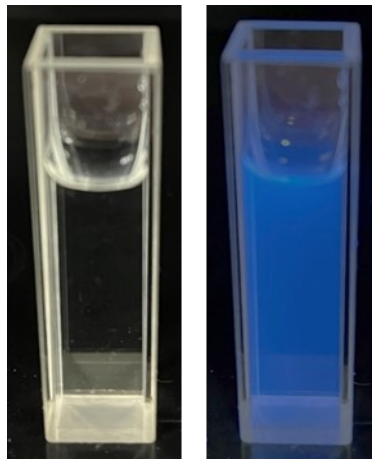

**Fig. S2.** Photographs of pefloxacin solution (1000 μM) under sunlight (left) and under UV (365 nm) irradiation (right).

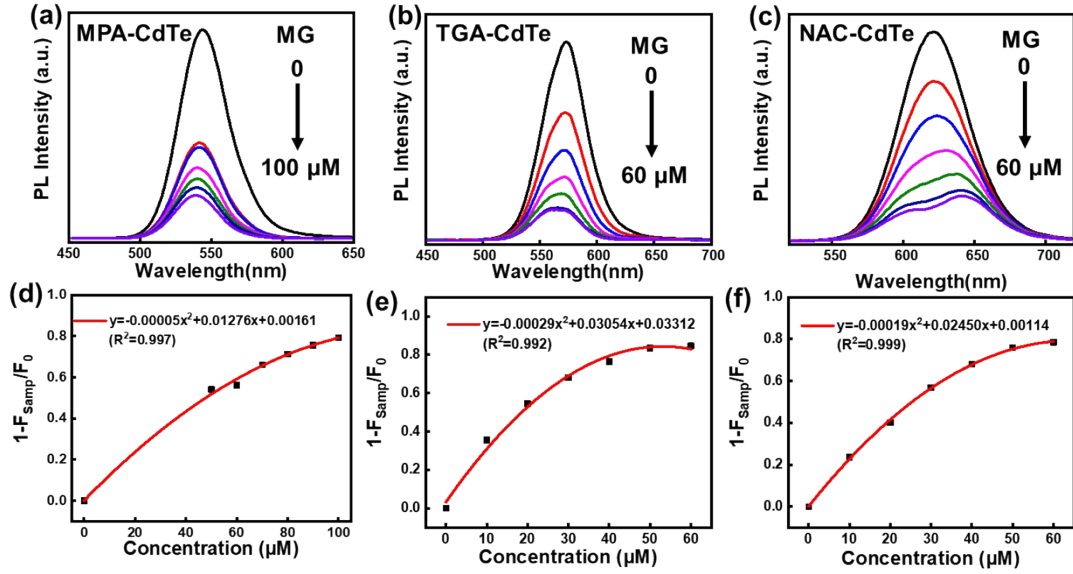

**Fig. S3.** PL spectra of (a) MPA-CdTe QDs, (b) TGA-CdTe QDs and (c) NAC-CdTe QDs with the addition of different concentrations of MG. The dependence of  $1-F_{\text{samp}}/F_0$  of (d) MPA-CdTe QDs, (e) TGA-CdTe QDs and (f) NAC-CdTe QDs on the concentration of MG.

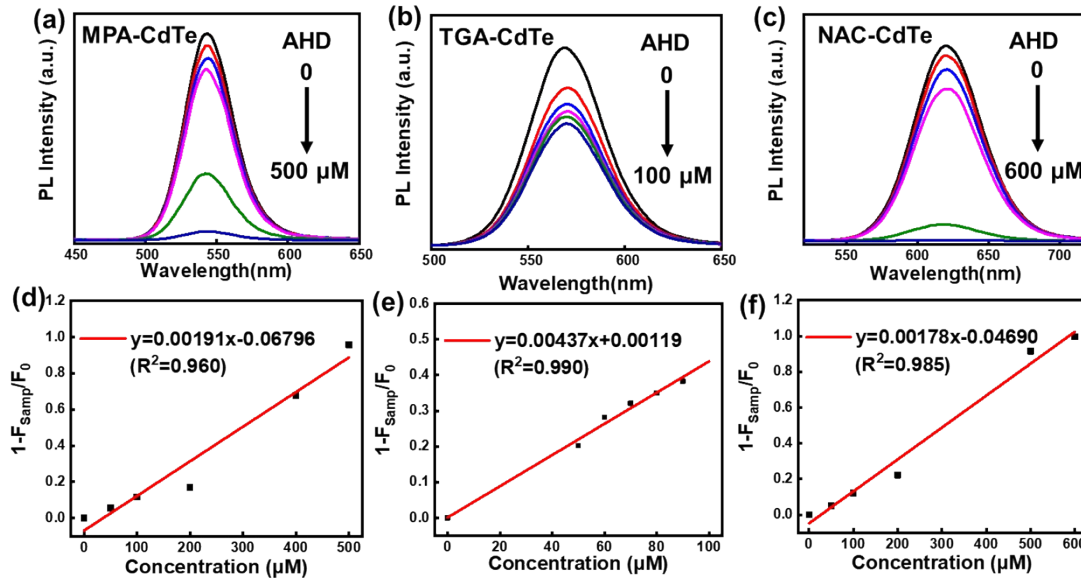

**Fig. S4.** PL spectra of (a) MPA-CdTe QDs, (b) TGA-CdTe QDs and (c) NAC-CdTe QDs with the addition of different concentrations of AHD. The dependence of  $1-F_{\text{samp}}/F_0$  of (d) MPA-CdTe QDs, (e) TGA-CdTe QDs and (f) NAC-CdTe QDs on the concentration of AHD.

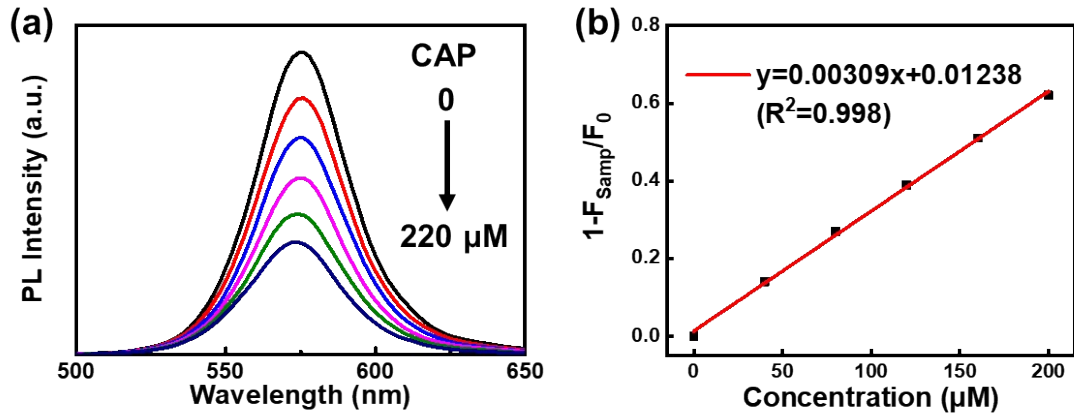

**Fig. S5.** (a) PL spectra of TGA-CdTe QDs with the addition of different concentrations of CAP. (b) Linear relationship between  $1-F_{\text{samp}}/F_0$  and CAP concentration.

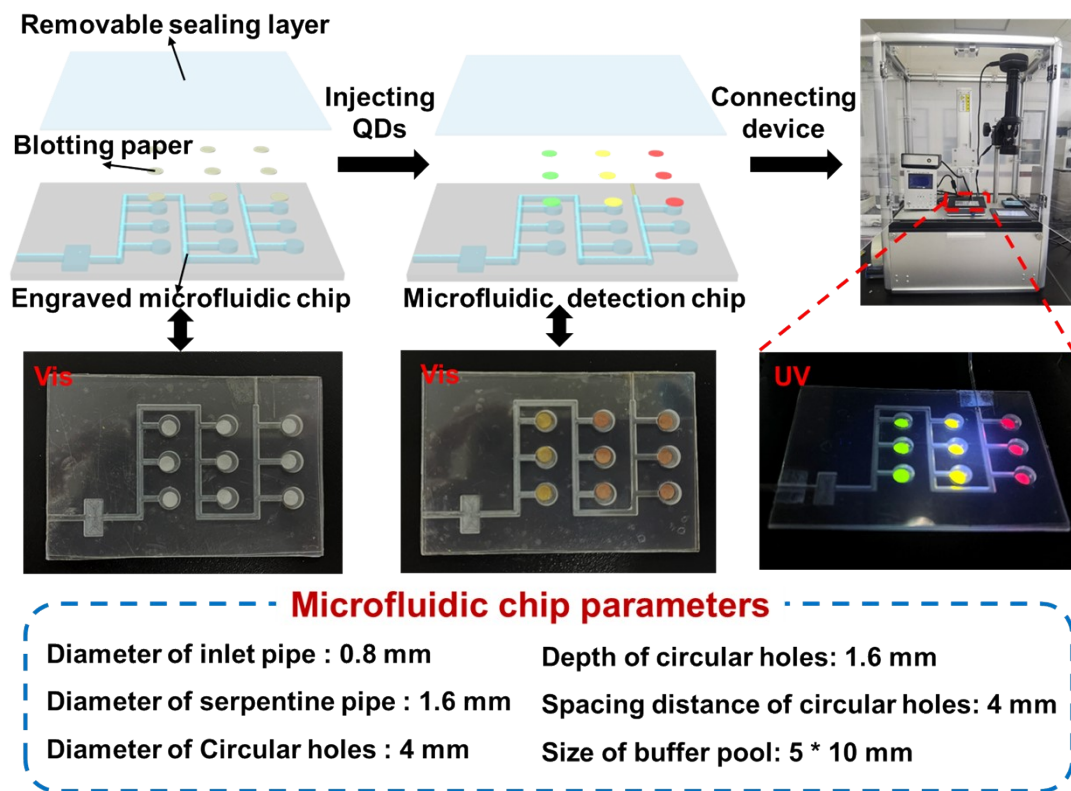

**Fig. S6.** Schematic illustrations of the construction of a microfluidic chip used for the detection platform and its related parameters.

**Movie S1.** Visual fluorescence sensing and detection towards veterinary drugs via microfluidic detection platform.
